# Supplementary material for: Use of a Biostimulant to Mitigate the Effects of Excess Salinity in Soil and Irrigation Water in Tomato Plants
Source: MDPI journal article supplement (doi:10.3390/plants12051190), 2023-03-06
Supplement: s1 [file s1]

**Table S1:** Numerical values of FW of leaves, stems and roots of tomato plants treated with biostimulant under four different salinity conditions.

| PERIOD | TREATMENT | LFW (g)         |                  | SFW (g)        |                | RFW (g)         |                 |
|--------|-----------|-----------------|------------------|----------------|----------------|-----------------|-----------------|
|        |           | CONTROL         | BALOX            | CONTROL        | BALOX          | CONTROL         | BALOX           |
| Day 30 | NSWN      | 19.14 ± 0.90 ab | 21.29 ± 0.52 a   | 9.65 ± 0.36 a  | 10.19 ± 0.33 a | 2.00 ± 0.23 abc | 2.74 ± 0.17 a   |
|        | SSWN      | 16.33 ± 0.58 b  | 18.57 ± 0.81 ab  | 7.11 ± 0.13 b  | 7.72 ± 0.15 b  | 1.59 ± 0.23 cd  | 2.58 ± 0.20 ab  |
|        | NSWS      | 11.34 ± 0.37 cd | 13.02 ± 0.57 c   | 4.02 ± 0.42 cd | 4.94 ± 0.46 c  | 1.35 ± 0.06 cd  | 1.91 ± 0.17 bc  |
|        | SSWS      | 8.46 ± 0.62 d   | 9.56 ± 0.54 d    | 2.36 ± 0.08 e  | 3.05 ± 0.25 de | 1.02 ± 0.07 d   | 1.5 ± 0.10 cd   |
| Day 60 | NSWN      | 27.98 ± 0.75 AB | 29.22 ± 0.77 A   | 18.40 ± 0.45 A | 19.75 ± 0.04 A | 8.62 ± 0.45 BC  | 11.29 ± 0.87 A  |
|        | SSWN      | 24.12 ± 0.82 C  | 27.43 ± 0.69 ABC | 13.20 ± 0.31 B | 14.43 ± 0.37 B | 7.56 ± 0.43 C   | 10.21 ± 0.24 AB |
|        | NSWS      | 15.91 ± 0.89 D  | 24.88 ± 0.53 BC  | 9.11 ± 0.27 C  | 10.28 ± 0.53 C | 2.16 ± 0.17 DE  | 3.60 ± 0.34 D   |
|        | SSWS      | 11.77 ± 0.57 E  | 18.64 ± 1.03 D   | 3.68 ± 0.43 D  | 4.82 ± 0.44 D  | 1.11 ± 0.14 E   | 1.67 ± 0.10 DE  |

NSWN (non-saline soil and non-saline water); SSWN (saline soil and non-saline water); NSWS (non-saline soil and saline water) and SSWS (saline soil and saline water) evaluated at the stage of vegetative development and beginning of reproductive development.

**Table S2:** Height (cm), diameter (mm) and number of leaves of tomato plants treated with biostimulant in four different salinity conditions.

| PERIOD | TREATMENT | HEIGHT (cm)     |                | STEM DIAMETER (mm) |                 | NUMBER OF LEAVES |                  |
|--------|-----------|-----------------|----------------|--------------------|-----------------|------------------|------------------|
|        |           | CONTROL         | BALOX          | CONTROL            | BALOX           | CONTROL          | BALOX            |
| Day 30 | NSWN      | 51.70 ± 0.45 a  | 54.00 ± 0.76 a | 4.27 ± 0.07 bc     | 4.83 ± 0.07 a   | 11.67 ± 0.33 bc  | 14.33 ± 0.67 ab  |
|        | SSWN      | 44.73 ± 0.99 b  | 46.20 ± 0.15 b | 4.10 ± 0.06 bc     | 4.47 ± 0.09 ab  | 11.33 ± 0.33 cd  | 14.67 ± 0.33 a   |
|        | NSWS      | 29.40 ± 1.11 d  | 33.63 ± 0.64 c | 3.93 ± 0.07 cd     | 4.50 ± 0.06 ab  | 9.33 ± 0.33 cd   | 11.67 ± 1.20 bc  |
|        | SSWS      | 20.83 ± 0.88 e  | 26.57 ± 0.54 d | 3.63 ± 0.09 d      | 3.97 ± 0.18 cd  | 8.67 ± 0.33 d    | 9.00 ± 0.00 cd   |
| Day 60 | NSWN      | 70.33 ± 0.88 B  | 76.50 ± 0.76 A | 4.77 ± 0.20 ABC    | 5.37 ± 0.09 A   | 15.67 ± 0.33 AB  | 17.00 ± 0.58 A   |
|        | SSWN      | 58.00 ± 0.58 C  | 71.67 ± 1.09 B | 4.50 ± 0.06 BCD    | 5.10 ± 0.20 AB  | 14.67 ± 0.33 AB  | 18.00 ± 1.15 A   |
|        | NSWS      | 34.50 ± 0.29 DE | 38.33 ± 0.88 D | 4.30 ± 0.15 CD     | 4.73 ± 0.07 ABC | 8.67 ± 0.88 CD   | 12.00 ± 2.08 BC  |
|        | SSWS      | 25.33 ± 1.20 F  | 30.67 ± 1.17 E | 3.83 ± 0.12 D      | 4.53 ± 0.12 BC  | 7.33 ± 0.33 D    | 11.33 ± 0.33 BCD |

NSWN (non-saline soil and non-saline water); SSWN (saline soil and non-saline water); NSWS (non-saline soil and saline water) and SSWS (saline soil and saline water) evaluated at the stage of vegetative development and beginning of reproductive development.

**Table S3:** Water content (%) in leaves (LWC), stems (SWC) and roots (RWC) of tomato plants treated with biostimulant under four different salinity conditions.

| PERIOD | TREATMENT | LWC (%)          |                  | SWC (%)         |                 | RWC (%)         |                 |
|--------|-----------|------------------|------------------|-----------------|-----------------|-----------------|-----------------|
|        |           | CONTROL          | BALOX            | CONTROL         | BALOX           | CONTROL         | BALOX           |
| Day 30 | NSWN      | 87.89 ± 0.23 ab  | 88.68 ± 0.65 a   | 85.03 ± 0.65 ab | 86.35 ± 0.54 a  | 80.85 ± 0.27 b  | 83.70 ± 0.34 a  |
|        | SSWN      | 86.76 ± 0.42 abc | 88.21 ± 0.35 ab  | 83.44 ± 0.40 bc | 85.64 ± 0.69 ab | 77.78 ± 0.56 c  | 80.76 ± 0.46 b  |
|        | NSWS      | 84.93 ± 0.43 cd  | 86.24 ± 0.03 bc  | 80.57 ± 0.30 de | 83.38 ± 0.14 bc | 73.17 ± 0.31 e  | 77.17 ± 0.48 cd |
|        | SSWS      | 83.53 ± 0.61 d   | 84.88 ± 0.49 cd  | 78.27 ± 0.63 e  | 81.87 ± 0.27 cd | 71.12 ± 0.44 f  | 75.80 ± 0.20 d  |
| Day 60 | NSWN      | 87.11 ± 0.68 AB  | 88.12 ± 0.24 A   | 90.52 ± 0.15 A  | 92.66 ± 0.55 A  | 84.54 ± 0.28 BC | 87.80 ± 0.97 A  |
|        | SSWN      | 85.08 ± 0.94 BC  | 87.84 ± 0.57 A   | 80.27 ± 0.44 C  | 83.63 ± 0.57 B  | 80.56 ± 0.23 D  | 86.61 ± 0.24 AB |
|        | NSWS      | 83.27 ± 0.33 CD  | 85.84 ± 0.43 ABC | 73.08 ± 0.27 E  | 78.07 ± 0.60 CD | 78.17 ± 0.44 E  | 85.25 ± 0.36 BC |
|        | SSWS      | 81.05 ± 0.49 D   | 83.99 ± 0.45 C   | 70.56 ± 0.67 F  | 76.35 ± 0.30 D  | 76.43 ± 0.34 E  | 83.99 ± 0.28 C  |

NSWN (non-saline soil and non-saline water); SSWN (saline soil and non-saline water); NSWS (non-saline soil and saline water) and SSWS (saline soil and saline water) evaluated at the stage of vegetative development and beginning of reproductive development.

**Table S4:** Chlorophyll a and b levels in tomato plants treated with biostimulant under four different salinity conditions.

| PERIOD | TREATMENT | Chl a (mg g <sup>-1</sup> DW) |                 | Chl b (mg g <sup>-1</sup> DW) |               |
|--------|-----------|-------------------------------|-----------------|-------------------------------|---------------|
|        |           | CONTROL                       | BALOX           | CONTROL                       | BALOX         |
| Day 30 | NSWN      | 14.71 ± 0.06 b                | 18.03 ± 0.09 a  | 3.01 ± 0.01 b                 | 3.62 ± 0.01 a |
|        | SSWN      | 12.48 ± 0.56 c                | 17.24 ± 0.47 a  | 2.71 ± 0.00 bc                | 3.40 ± 0.10 a |
|        | NSWS      | 9.93 ± 0.07 d                 | 11.46 ± 0.12 cd | 2.03 ± 0.04 d                 | 2.63 ± 0.05 c |
|        | SSWS      | 6.08 ± 0.36 e                 | 9.98 ± 0.57 d   | 1.76 ± 0.11 d                 | 2.43 ± 0.12 c |
| Day 60 | NSWN      | 8.02 ± 0.01 C                 | 11.66 ± 0.15 A  | 3.04 ± 0.01 C                 | 4.48 ± 0.00 A |
|        | SSWN      | 7.15 ± 0.12 D                 | 9.77 ± 0.17 B   | 2.84 ± 0.01 D                 | 4.29 ± 0.00 B |
|        | NSWS      | 4.45 ± 0.06 E                 | 7.29 ± 0.06 D   | 1.13 ± 0.00 F                 | 3.04 ± 0.00 C |
|        | SSWS      | 1.45 ± 0.01 G                 | 2.66 ± 0.01 F   | 0.74 ± 0.01 G                 | 1.89 ± 0.00 E |

NSWN (non-saline soil and non-saline water); SSWN (saline soil and non-saline water); NSWS (non-saline soil and saline water) and SSWS (saline soil and saline water) evaluated at the stage of vegetative development and beginning of reproductive development.

Table S5: Simplified scheme of treatments for each evaluation period, vegetative development (30 days) and the onset of reproductive development (60 days). There were 20 treatments with three completely randomised replicates for each harvesting season, resulting in 120 pots.

| TREATMENT | BIOST. TYPE | WATER<br>SALINITY | SOIL SALINITY | BIOST. DOSE |
|-----------|-------------|-------------------|---------------|-------------|
| 1         | B0          | No Saline         | No Saline     | D0          |
| 2         | B1          | No Saline         | No Saline     | D1          |
| 3         | B1          | No Saline         | No Saline     | D2          |
| 4         | B2          | No Saline         | No Saline     | D1          |
| 5         | B2          | No Saline         | No Saline     | D2          |
| 6         | B0          | No Saline         | Saline        | D0          |
| 7         | B1          | No Saline         | Saline        | D1          |
| 8         | B1          | No Saline         | Saline        | D2          |
| 9         | B2          | No Saline         | Saline        | D1          |
| 10        | B2          | No Saline         | Saline        | D2          |
| 11        | B0          | Saline            | No Saline     | D0          |
| 12        | B1          | Saline            | No Saline     | D1          |
| 13        | B1          | Saline            | No Saline     | D2          |
| 14        | B2          | Saline            | No Saline     | D1          |
| 15        | B2          | Saline            | No Saline     | D2          |
| 16        | B0          | Saline            | Saline        | D0          |
| 17        | B1          | Saline            | Saline        | D1          |
| 18        | B1          | Saline            | Saline        | D2          |
| 19        | B2          | Saline            | Saline        | D1          |
| 20        | B2          | Saline            | Saline        | D2          |

**Table S6.** Correlation coefficients between the first two PCs (PC1 and PC2) and the variables included in PCA.

| QUANTITATIVE<br>VARIABLES        | PC1      |          | PC2      |          |
|----------------------------------|----------|----------|----------|----------|
|                                  | R        | P        | R        | P        |
| <b>Caro</b>                      | 0.840665 | 7.72E-14 | -0.46448 | 8.82E-04 |
| <b>CAT</b>                       | -0.97122 | 2.61E-30 | 0.168129 | 2.53E-01 |
| <b>Chl a</b>                     | 0.801078 | 8.06E-12 | -0.53981 | 7.51E-05 |
| <b>Chl b</b>                     | 0.933014 | 4.76E-22 | 0.172514 | 2.41E-01 |
| <b>GB</b>                        | -0.45897 | 1.03E-03 | 0.345237 | 1.63E-02 |
| <b>GR</b>                        | -0.9688  | 1.63E-29 | 0.174967 | 2.34E-01 |
| <b>H2O2</b>                      | -0.87415 | 4.95E-16 | 0.366783 | 1.03E-02 |
| <b>L[Ca]</b>                     | 0.903513 | 1.52E-18 | 0.329469 | 2.22E-02 |
| <b>L[Cl]</b>                     | -0.92674 | 3.49E-21 | 0.235047 | 1.08E-01 |
| <b>L[K]</b>                      | 0.768661 | 1.78E-10 | -0.46503 | 8.68E-04 |
| <b>L[Na]</b>                     | -0.92382 | 8.30E-21 | 0.133781 | 3.65E-01 |
| <b>LFW</b>                       | 0.672615 | 1.64E-07 | 0.681694 | 9.60E-08 |
| <b>LWC</b>                       | 0.926975 | 3.25E-21 | -0.10908 | 4.60E-01 |
| <b>MDA</b>                       | -0.96247 | 1.07E-27 | -0.03835 | 7.96E-01 |
| <b>NL</b>                        | 0.816377 | 1.53E-12 | 0.433963 | 2.06E-03 |
| <b>Pro</b>                       | -0.97291 | 6.64E-31 | 0.03344  | 8.21E-01 |
| <b>R[Ca]</b>                     | 0.906134 | 8.32E-19 | 0.209197 | 1.54E-01 |
| <b>R[Cl]</b>                     | -0.96876 | 1.68E-29 | 0.081782 | 5.81E-01 |
| <b>R[K]</b>                      | 0.755077 | 5.63E-10 | -0.62308 | 2.25E-06 |
| <b>R[Na]</b>                     | -0.97655 | 2.49E-32 | -0.06034 | 6.84E-01 |
| <b>RFW</b>                       | 0.607026 | 4.78E-06 | 0.721556 | 7.20E-09 |
| <b>RWC</b>                       | 0.608127 | 4.55E-06 | 0.640369 | 9.50E-07 |
| <b>SD</b>                        | 0.679926 | 1.07E-07 | 0.561466 | 3.30E-05 |
| <b>SFW</b>                       | 0.701869 | 2.73E-08 | 0.636848 | 1.14E-06 |
| <b>SL</b>                        | 0.834187 | 1.79E-13 | 0.4888   | 4.23E-04 |
| <b>SOD</b>                       | -0.96772 | 3.52E-29 | 0.138655 | 3.47E-01 |
| <b>SWC</b>                       | 0.916507 | 6.31E-20 | -0.0473  | 7.50E-01 |
| <b>TF</b>                        | -0.84234 | 6.17E-14 | 0.347384 | 1.56E-02 |
| <b>TPC</b>                       | -0.62488 | 2.06E-06 | 0.538579 | 7.85E-05 |
| <b>TSS</b>                       | 0.916463 | 6.38E-20 | 0.221447 | 1.30E-01 |
| <b>CATEGORICAL<br/>VARIABLES</b> |          |          |          |          |
| <b>BIOSTIMULANT</b>              | 0.1255   | 1.35E-02 | 0.008415 | 5.35E-01 |
| <b>PERIOD</b>                    | 0.023257 | 3.01E-01 | 0.936963 | 2.97E-29 |
| <b>SOIL</b>                      | 0.106931 | 2.33E-02 | 0.001281 | 8.09E-01 |
| <b>WATER</b>                     | 0.691648 | 2.47E-13 | 0.013931 | 4.24E-01 |

Variables: stem length (SL); stem diameter (SD); number of leaves (NL); fresh root weight (RFW); stem fresh weight (SFW); fresh leaf weight (LFW); root water content (RWC); stem water content (SWC); leaf water content (LWC); chlorophyll a (Chl.a); chlorophyll b (Chl. b); total carotenoids (Caro); root calcium (R [Ca]); leaf calcium (L [Ca]); root potassium (R [K]); leaf potassium (L [K]); root sodium (R [Na]); leaf sodium (L [Na]); root chloride (R [Cl]); leaf chloride (L [Cl]); proline (Pro); glycine betaine (GB); total sugars (TSS); malondialdehyde (MDA); hydrogen peroxide (H2O2); superoxide dismutase (SOD); catalase (CAT); glutathione reductase (GR); total phenolic compounds (TPC); total flavonoids (TF).

**Table S7.** Eigen analysis of PCA between the 30 active variables.

| PC   | EIGENVALUE | PERCENTAGE<br>OF VARIANCE | CUMULATIVE<br>PERCENTAGE OF<br>VARIANCE |
|------|------------|---------------------------|-----------------------------------------|
| PC1  | 2.14E+01   | 71.4499635                | 71.44996                                |
| PC2  | 4.73E+00   | 15.7633017                | 87.21327                                |
| PC3  | 1.43E+00   | 4.76844943                | 91.98171                                |
| PC4  | 7.56E-01   | 2.51878869                | 94.5005                                 |
| PC5  | 3.20E-01   | 1.06785308                | 95.56836                                |
| PC6  | 2.66E-01   | 0.88685416                | 96.45521                                |
| PC7  | 2.23E-01   | 0.74182846                | 97.19704                                |
| PC8  | 1.60E-01   | 0.53254439                | 97.72958                                |
| PC9  | 1.42E-01   | 0.47219359                | 98.20178                                |
| PC10 | 1.16E-01   | 0.38510448                | 98.58688                                |
| PC11 | 9.46E-02   | 0.3152283                 | 98.90211                                |
| PC12 | 8.04E-02   | 0.26790898                | 99.17002                                |
| PC13 | 5.47E-02   | 0.18236556                | 99.35238                                |
| PC14 | 4.35E-02   | 0.1450279                 | 99.49741                                |
| PC15 | 2.82E-02   | 0.09387962                | 99.59129                                |
| PC16 | 2.68E-02   | 0.08947736                | 99.68077                                |
| PC17 | 2.03E-02   | 0.06755321                | 99.74832                                |
| PC18 | 1.76E-02   | 0.05881428                | 99.80714                                |
| PC19 | 1.26E-02   | 0.0419855                 | 99.84912                                |
| PC20 | 1.00E-02   | 0.0333437                 | 99.88247                                |
| PC21 | 9.01E-03   | 0.03004187                | 99.91251                                |
| PC22 | 8.02E-03   | 0.0267466                 | 99.93925                                |
| PC23 | 5.60E-03   | 0.01867635                | 99.95793                                |
| PC24 | 4.08E-03   | 0.01360193                | 99.97153                                |
| PC25 | 3.19E-03   | 0.01063166                | 99.98216                                |
| PC26 | 2.00E-03   | 0.00668045                | 99.98884                                |
| PC27 | 1.49E-03   | 0.00497815                | 99.99382                                |
| PC28 | 8.24E-04   | 0.00274809                | 99.99657                                |
| PC29 | 6.57E-04   | 0.00219025                | 99.99876                                |
| PC30 | 3.72E-04   | 0.00123877                | 100.00000                               |
